# Supplementary material
Source: PubMed Central journal article supplement (PMC9232973)
Supplement: NIHMS1788535-supplement-1.pdf [file NIHMS1788535-supplement-1.pdf]

Supplemental Table S1. Demographic and Tumor Characteristics Stratified by Early-Onset (EOPC) and Late-Onset (LOPC) Invasive Pancreatic Cancer, 1995-2018

| Characteristic                         | EOPC (age 0-54)<br>(N=80,908) |       | LOPC (age 55+)<br>(N=632,714) |       | Total<br>(N=713,622) |       |
|----------------------------------------|-------------------------------|-------|-------------------------------|-------|----------------------|-------|
|                                        | N                             | Col % | N                             | Col % | N                    | Col % |
| <b>Sex</b>                             |                               |       |                               |       |                      |       |
| Male                                   | 47,533                        | 58.7% | 317,062                       | 50.1% | 364,595              | 51.1% |
| Female                                 | 33,375                        | 41.3% | 315,652                       | 49.9% | 349,027              | 48.9% |
| <b>Race/ethnicity</b>                  |                               |       |                               |       |                      |       |
| Non-Hispanic White                     | 56,007                        | 69.2% | 498,709                       | 78.8% | 554,716              | 77.7% |
| Non-Hispanic Black                     | 13,409                        | 16.6% | 71,467                        | 11.3% | 84,876               | 11.9% |
| Hispanic                               | 8,033                         | 9.9%  | 40,655                        | 6.4%  | 48,688               | 6.8%  |
| Non-Hispanic Asian/Pacific Islander    | 2,602                         | 3.2%  | 17,443                        | 2.8%  | 20,045               | 2.8%  |
| Other/Unknown                          | 857                           | 1.1%  | 4,440                         | 0.7%  | 5,297                | 0.8%  |
| <b>Year of diagnosis</b>               |                               |       |                               |       |                      |       |
| 1995-1999                              | 11,954                        | 14.8% | 87,611                        | 13.9% | 99,565               | 14.0% |
| 2000-2009                              | 35,118                        | 43.4% | 243,150                       | 38.4% | 278,268              | 39.0% |
| 2010-2018                              | 33,836                        | 41.8% | 301,953                       | 47.7% | 335,789              | 47.0% |
| <b>Summary stage</b>                   |                               |       |                               |       |                      |       |
| Localized                              | 5,242                         | 6.5%  | 59,918                        | 9.5%  | 65,160               | 9.1%  |
| Regional                               | 26,817                        | 33.1% | 202,639                       | 32.0% | 229,456              | 32.2% |
| Distant                                | 44,908                        | 55.5% | 313,350                       | 49.5% | 358,258              | 50.2% |
| Unknown                                | 3,941                         | 4.9%  | 56,807                        | 9.0%  | 60,748               | 8.5%  |
| <b>Grade</b>                           |                               |       |                               |       |                      |       |
| Well differentiated; Grade I           | 3,649                         | 4.5%  | 25,383                        | 4.0%  | 29,032               | 4.1%  |
| Moderately differentiated; Grade II    | 14,233                        | 17.6% | 91,474                        | 14.5% | 105,707              | 14.8% |
| Poorly differentiated; Grade III       | 15,319                        | 18.9% | 96,423                        | 15.2% | 111,742              | 15.6% |
| Undifferentiated; anaplastic; Grade IV | 605                           | 0.8%  | 3,586                         | 0.6%  | 4,191                | 0.6%  |
| Unknown                                | 47,102                        | 58.2% | 415,848                       | 65.7% | 462,950              | 64.9% |
| <b>Tumor site</b>                      |                               |       |                               |       |                      |       |
| Head                                   | 39,832                        | 49.2% | 317,808                       | 50.2% | 357,640              | 50.1% |
| Body                                   | 9,011                         | 11.2% | 71,334                        | 11.3% | 80,345               | 11.3% |
| Tail                                   | 11,015                        | 13.6% | 75,527                        | 11.9% | 86,542               | 12.1% |
| Other                                  | 21,050                        | 26.0% | 168,045                       | 26.6% | 189,095              | 26.5% |

## Supplemental Methods

Using the 1995-2018 CiNA Public Use Data Set from the North American Association of Central Cancer Registries (NAACCR), we identified incident invasive pancreatic adenocarcinoma cancer cases based on SEER Site Recode ICD-O-3/World Health Organization 2008 definitions (ICD-O-3 site codes C25.0-C25.9 and adenocarcinoma-specific histology codes) and stratified cases by EOPC (diagnosed aged 0-54) and LOPC (diagnosed age 55+). We evaluated the distribution of sex (male, female), race/ethnicity (non-Hispanic white, non-Hispanic black, Hispanic, non-Hispanic Asian/Pacific Islander, non-Hispanic American Indian, other/unknown), year of diagnosis (1995-1999, 2000-2009, 2010-2018), SEER summary stage (localized, regional, distant, unknown), grade (I, II, III, IV, unknown) and tumor site (head, body, tail, other) within EOPC and LOPC separately. Due to small sample sizes, non-Hispanic American Indian and other racial/ethnic groups were excluded from the calculation of incidence rates.

We used SEER\*Stat software version 8.3.9 to obtain case distributions by demographic and tumor characteristics and calculate annual age-adjusted incidence rates (AAIR) standardized to the 2000 US Standard Population for the entire cohort and by sex and race/ethnicity. Average annual percent change (AAPC) in AAIRs was calculated using the Joinpoint Regression Program version 4.9.0.0 to analyze the time trends in AAIRs by sex and race/ethnicity. AAIRs and AAPCs were calculated for EOPC and LOPC separately.
